# Supplementary material
Source: PubMed Central journal article supplement (PMC7946408)
Supplement: NIHMS1599535-supplement-Figure_S1.pdf [file NIHMS1599535-supplement-Figure_S1.pdf]

# A Patient 339

Treatment Timeline

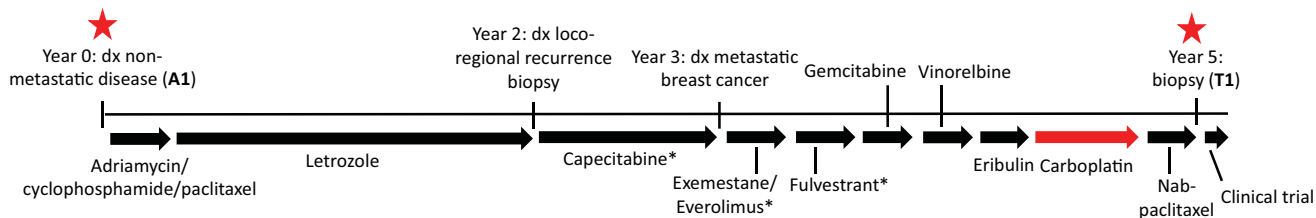

Gene schematic

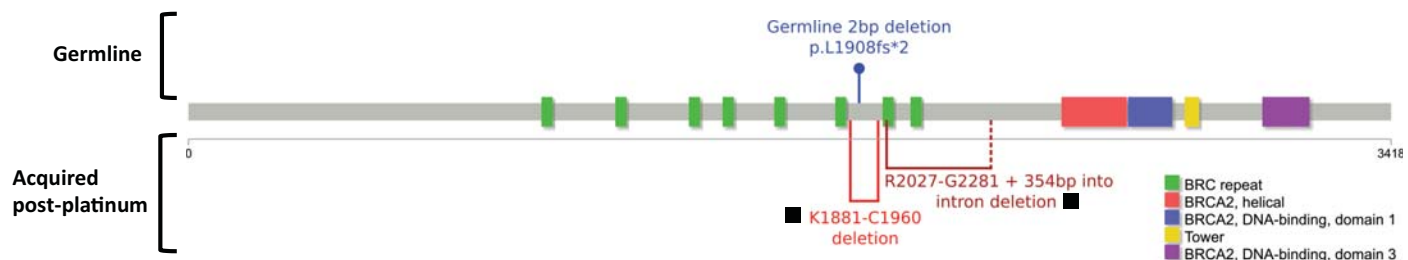

Rad51 results

Pre-carboplatin (A1) Post-carboplatin (T1)

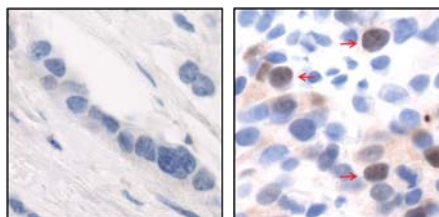

■ : identified in T1 tissue only  
 ★ : tissue analyzed

# B Patient 510

Treatment Timeline

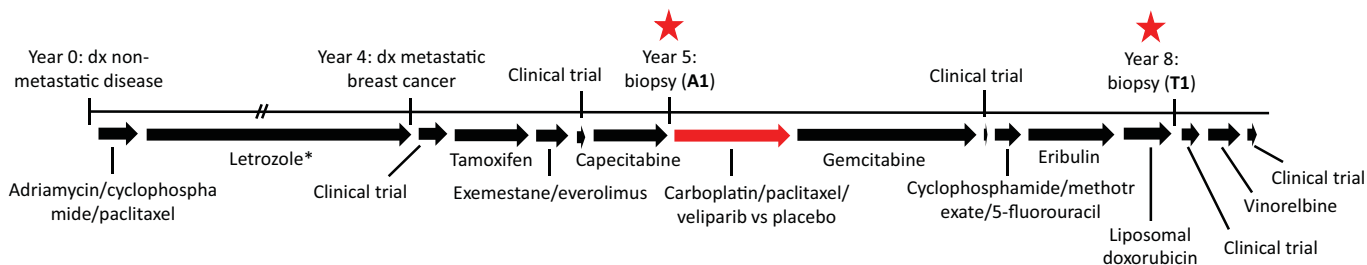

Gene schematic

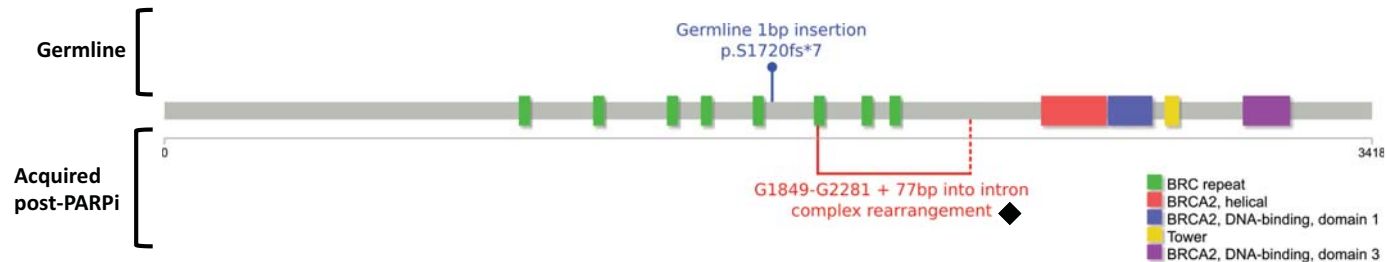

Rad51 results

Pre-carboplatin (A1) Post-carboplatin (T1)

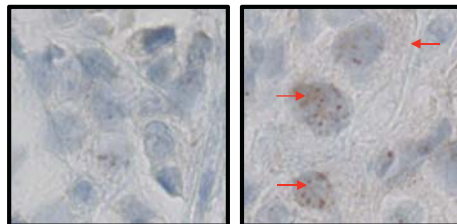

◆ : identified in T1 tissue and ctDNA (1 specimen sequenced)  
 ★ : tissue analyzed
