# Supplementary material
Source: PubMed Central journal article supplement (PMC7946408)

# A Patient 303

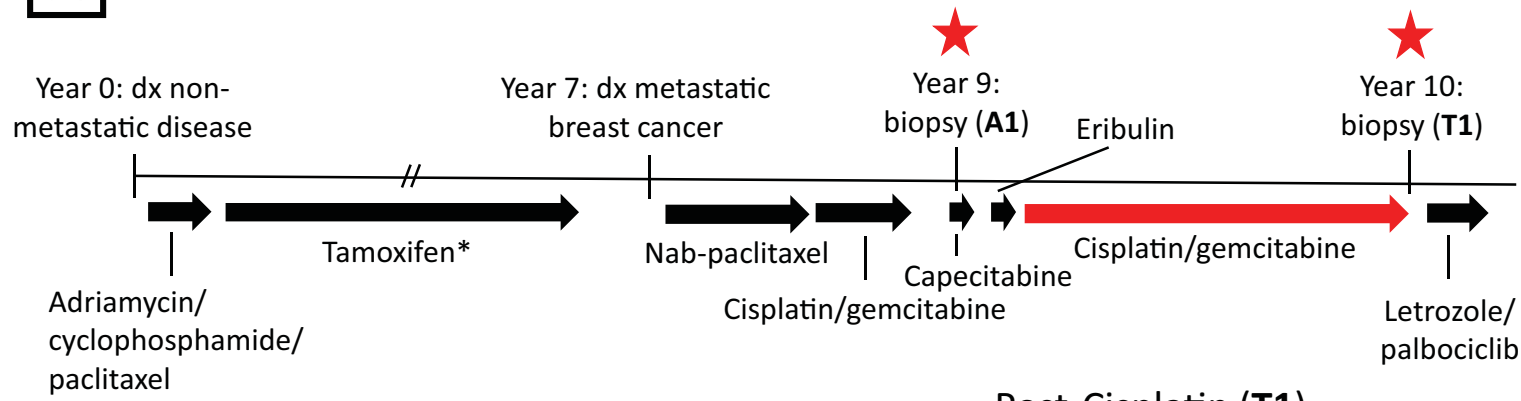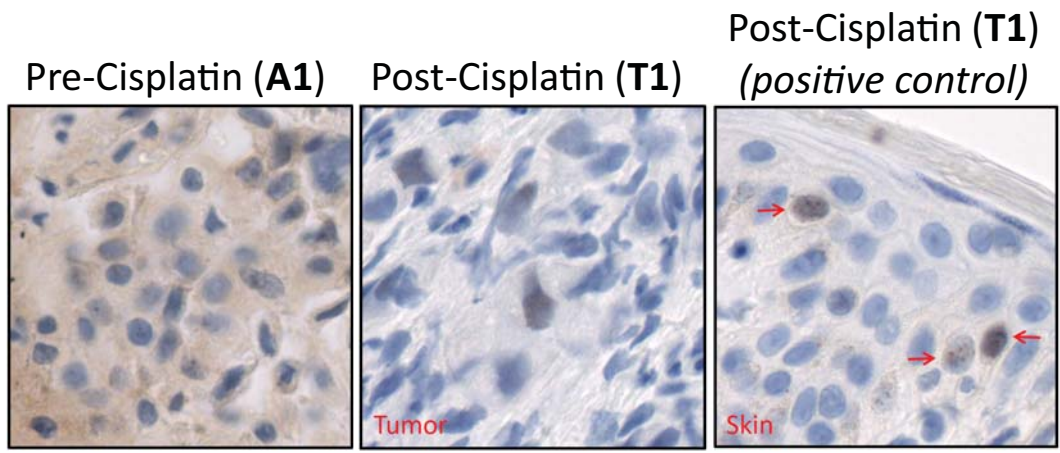

★ : tissue analyzed

# B Patient 565

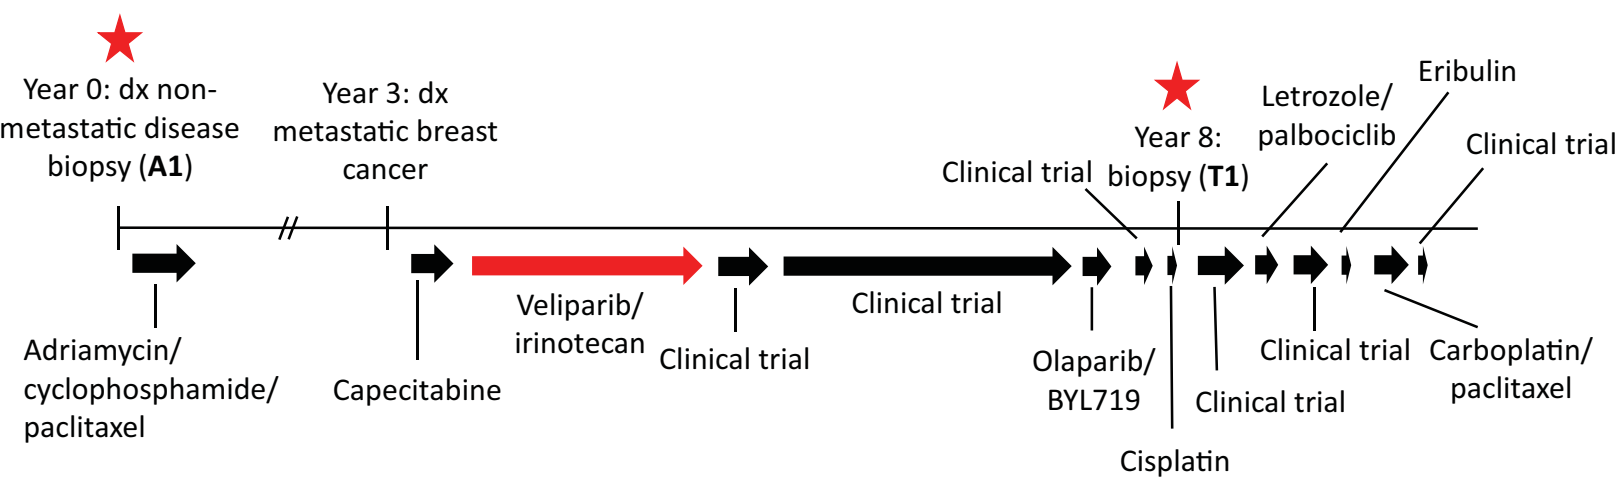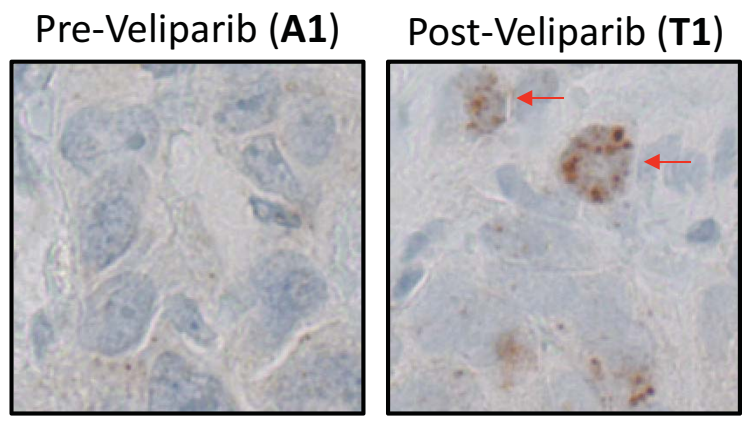

★ : tissue analyzed

Supplement: NIHMS1599535-supplement-Figure_S2.pdf [file NIHMS1599535-supplement-Figure_S2.pdf]
